# Supplementary material for: A novel pH-responsive hollow mesoporous silica nanoparticle (HMSN) system encapsulating doxorubicin (DOX) and glucose oxidase (GOX) for potential cancer treatment
Source: Royal Society of Chemistry journal article supplement (doi:10.1039/c8tb03198c), 2019-01-01
Supplement: c8tb03198c1.pdf [file c8tb03198c1.pdf]

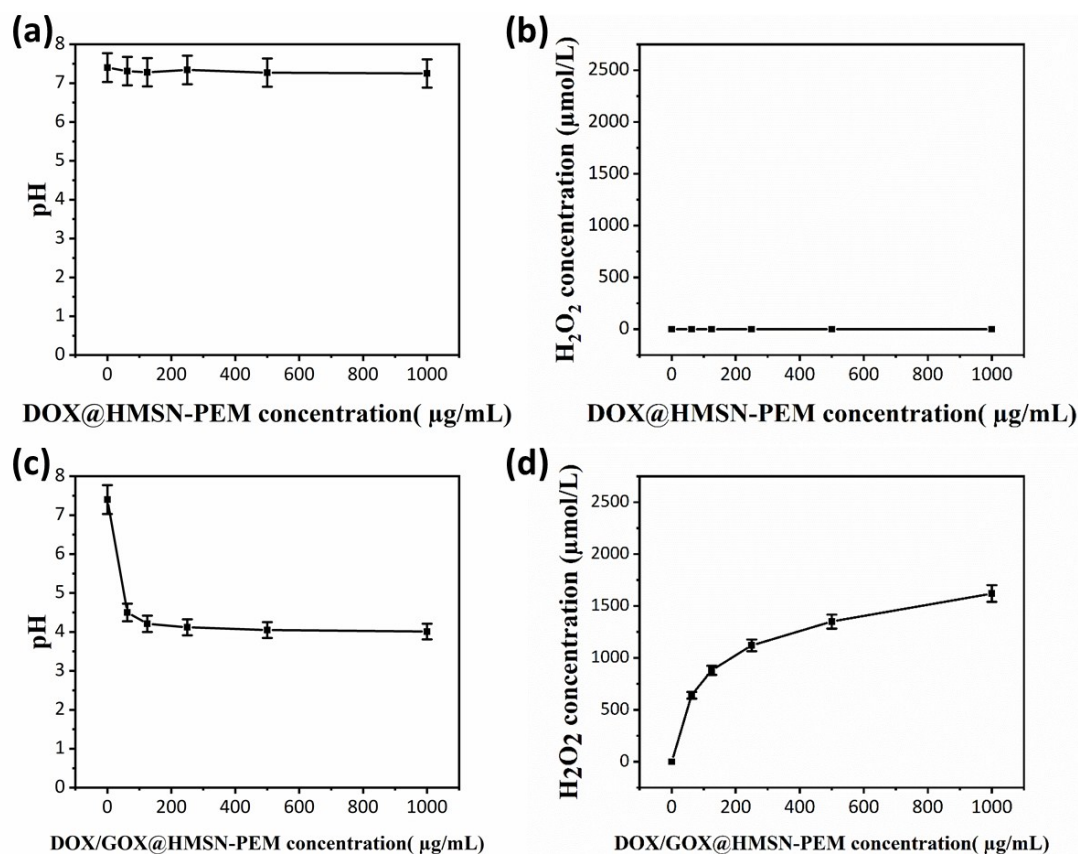

**Figure S1.** pH values at different concentration of (a) DOX@HMSN-PEM and (c) DOX/GOX@HMSN-PEM in DEME (glucose concentration equals to 1 mg/mL), incubated for 3 hours in the dark at 37 °C. H<sub>2</sub>O<sub>2</sub> concentration arising from the different concentration of (b) DOX/GOX@HMSN-PEM and (d) DOX/GOX@HMSN-PEM in DEME (glucose concentration equals to 1 mg/mL), incubated for 3 hours in the dark at 37 °C.

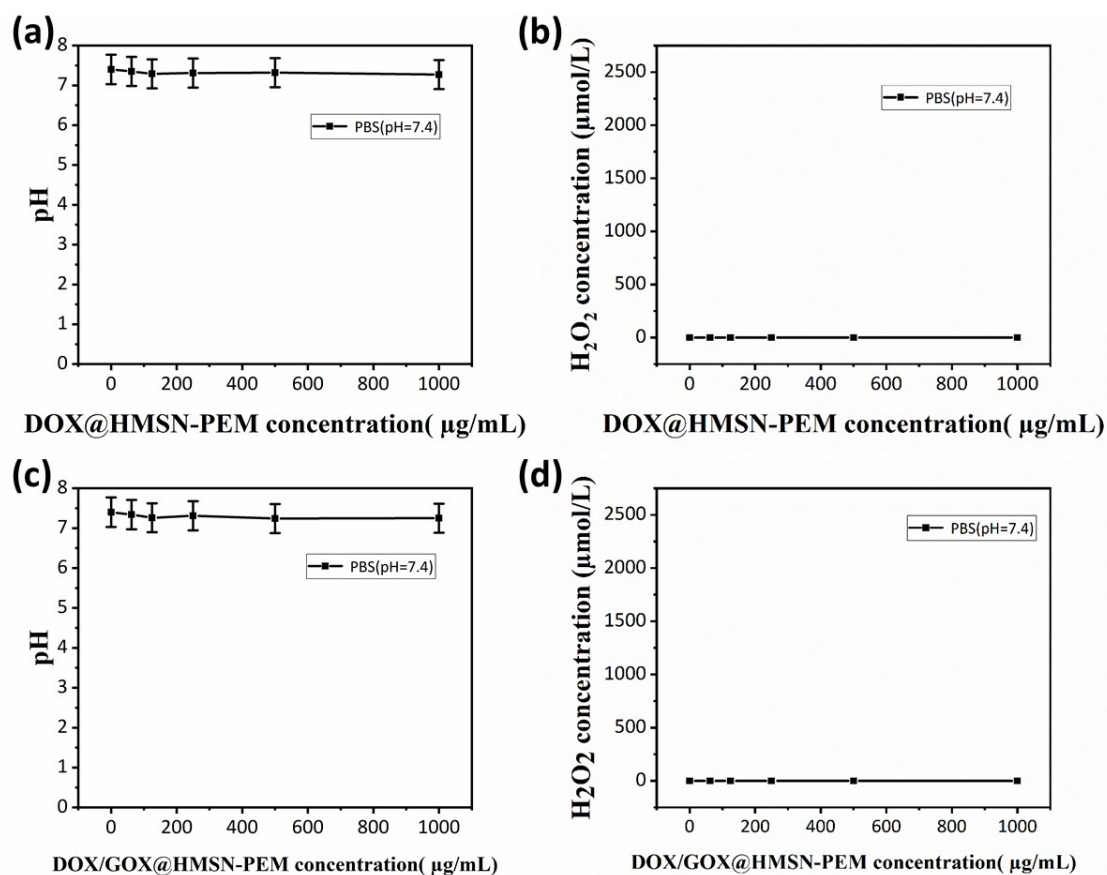

**Figure S2.** pH values at different concentration of (a) DOX@HMSN-PEM and (c) DOX/GOX@HMSN-PEM in PBS (pH=7.4), incubated for 3 hours in the dark at 37 °C.  $\text{H}_2\text{O}_2$  concentration arising from the different concentration of (b) DOX/GOX@HMSN-PEM and (d) DOX/GOX@HMSN-PEM in PBS (pH=7.4), incubated for 3 hours in the dark at 37 °C.

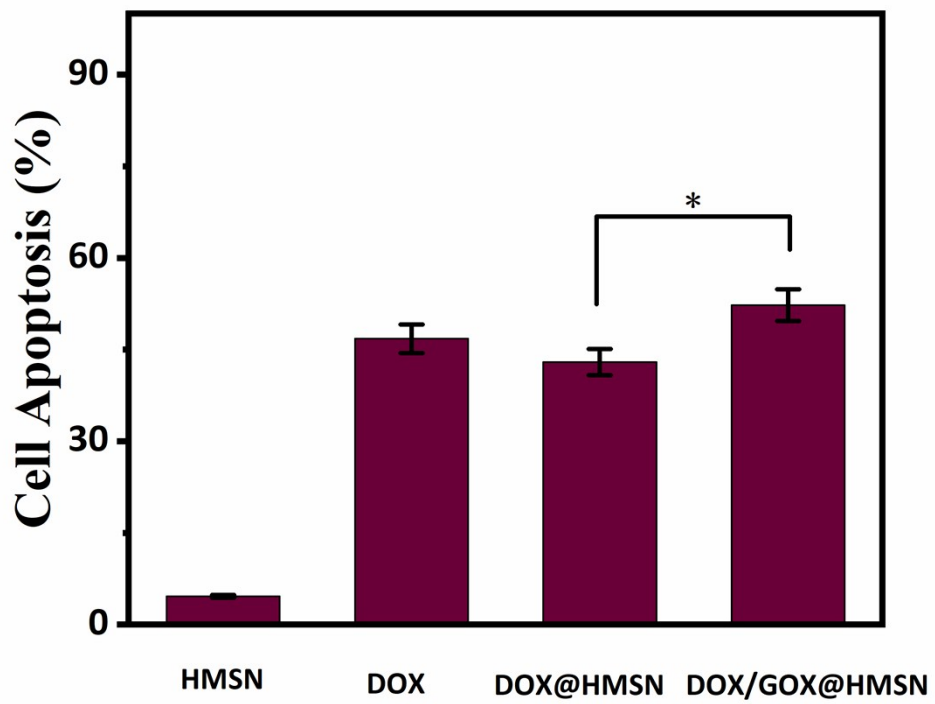

**Figure S3.** Cell apoptosis induced by HMSN, DOX@HMSN, free DOX, DOX/GOX@HMSN with the same dosage of 5  $\mu\text{g}/\text{mL}$  DOX for 12 h. Data were shown as mean  $\pm$  S.D. (n=3). Significance is defined as \*  $P < 0.05$ , \*\*  $P < 0.01$

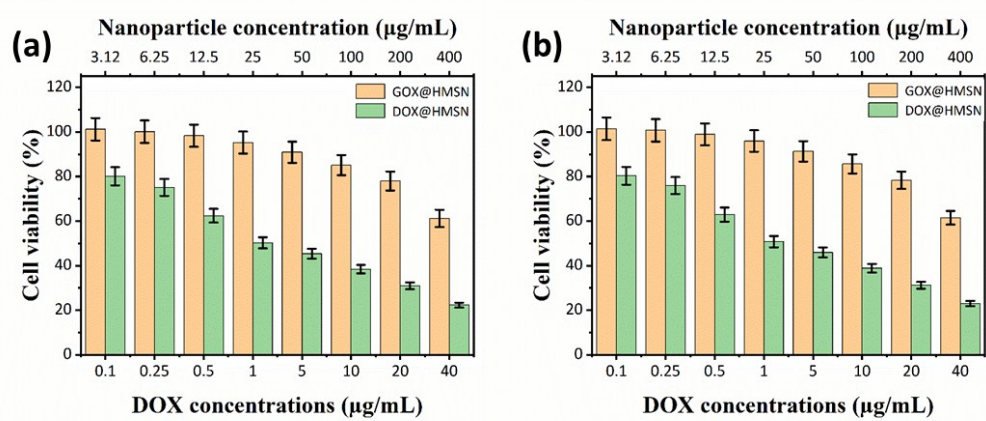

**Figure S4.** Cell viability rates of A549 (a) and MCF-7(b) treated by different nanoparticles calculated by MTT assay.
